# Supplementary material for: Response to Immune Checkpoint Inhibition in Two Patients with Alveolar Soft-Part Sarcoma
Source: Oxford University Press journal article supplement (doi:10.1158/2326-6066.cir-18-0037), 2018-07-17
Supplement: 23266066cir180037-sup-196163_2_supp_4867920_pb9plh.docx [file 23266066cir180037-sup-196163_2_supp_4867920_pb9plh.docx]

**Figure S4A: FCE electrophoretograms for Patient 1**

**
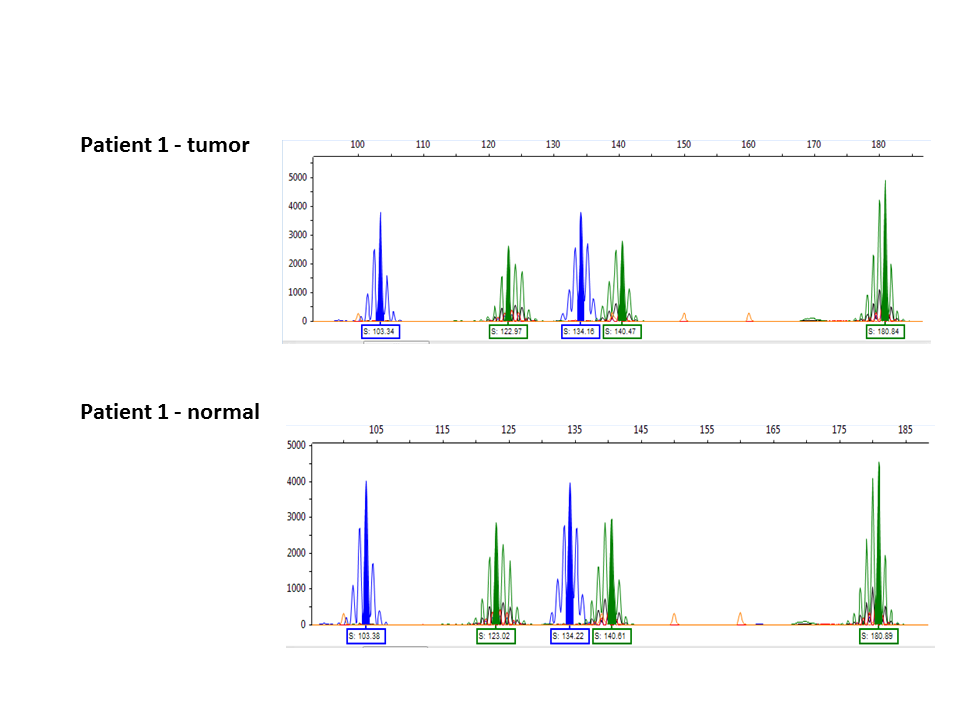
**

**Figure S4B: FCE electrophoretograms for Patient 2**

**
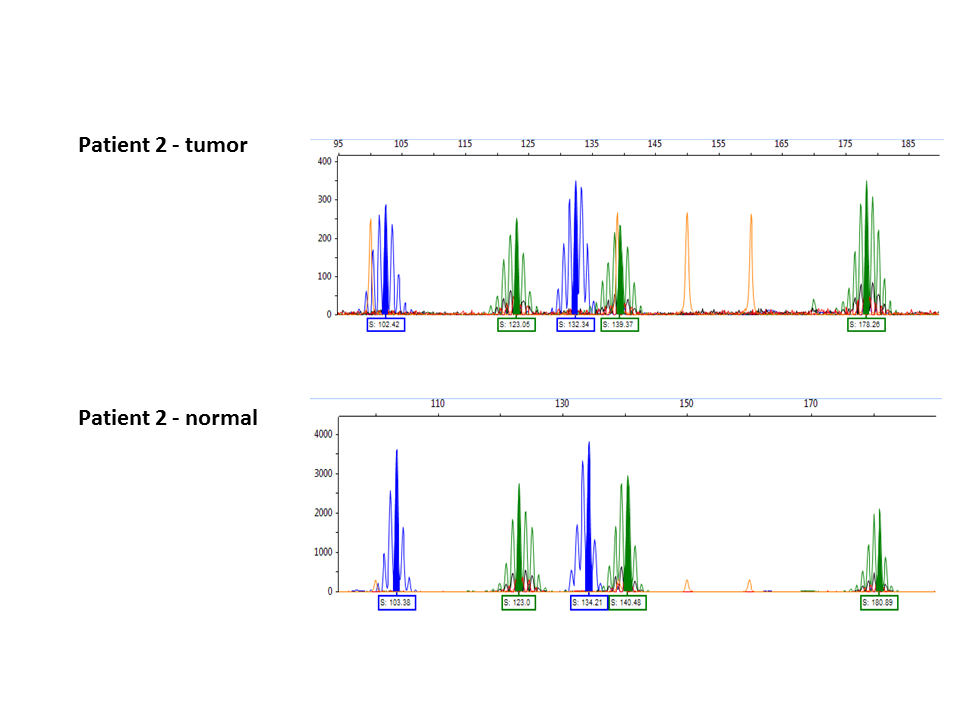
**
